# Supplementary material for: Multiomics Analysis of the mdx/mTR Mouse Model of Duchenne Muscular Dystrophy
Source: bioRxiv or medRxiv preprint supplement (doi:10.1101/589424), 2019-10-25
Supplement: Supplementary file [file media-5.pdf]

**Supplementary Table S5. qPCR Primers.** Sequences of primers used for qPCR.

| Symbol         | Description                                             | GenBank ID  | Forward Primer (5' to 3') | Reverse Primer (5' to 3') | Size (bp) |
|----------------|---------------------------------------------------------|-------------|---------------------------|---------------------------|-----------|
| <i>B2m</i>     | Beta 2 microglobulin                                    | NM_009735.3 | ATGGGAAGCCGAACATACTG      | CAGTCTCAGTGGGGGTGAAT      | 177       |
| <i>Coll1a1</i> | Collagen, type 1, alpha 1                               | NM_007742.3 | GAGAGGTGAACAAGGTCCCG      | AAACCTCTCTCGCCTCTTGC      | 153       |
| <i>Col5a1</i>  | Collagen, type V, alpha 1                               | NM_015734.2 | GGAGAGCCACGTGTTCTGTAG     | GAGGGAATGAGGCATGGCAG      | 135       |
| <i>Dgat2</i>   | Diacylglycerol O-acyltransferase 2                      | NM_026384.3 | ACTGGAACACGCCCAAGAAA      | GTAGTCTCGGAAGTAGCGCC      | 80        |
| <i>Fbxo32</i>  | Atrogin-1, F-box protein 32                             | NM_026346.3 | GCCCTCCACACTAGTTGACC      | GACGGATTGACAGCCAGGAA      | 119       |
| <i>Mmp14</i>   | Matrix metalloproteinase 14                             | NM_008608.3 | AGGCCAATGTTCCGAGGAAG      | GTGGCACTCTCCCATACTCG      | 154       |
| <i>Mstn</i>    | Myostatin                                               | NM_010834.3 | TCACGCTACCACGGAAACAA      | GCAACATTTGGGCTTGCCAT      | 82        |
| <i>Myh8</i>    | Myosin, heavy polypeptide 8, skeletal muscle, perinatal | NM_177369.3 | CGGGAGGTTACACCAAAAT       | CCCTCCTGTGCTTTCCTTCAG     | 88        |
| <i>Tmem8c</i>  | Myomaker, Transmembrane protein 8C                      | NM_025376.3 | GCCTTTACCACCTTCTCCCA      | GCCTCCATGTAGAAACGCCTC     | 144       |
